# Supplementary material
Source: publisher site journal article supplement (http://kjim.org/upload/media/kjim-2019-270-suppl6.pdf)
Supplement: Supplementary file 1 [file kjim-2019-270-suppl6.pdf]

Supplementary Table 5. Correlation of ROR2 protein concentration with WNT pathway-related gene expression in IPF patients ( $p < 0.05$ )

| Gene                                            | Wnt pathway | IPF1     | IPF2     | IPF3     | IPF4     | IPF5     | IPF6     | IPF7     | IPF8     | r      | p value |
|-------------------------------------------------|-------------|----------|----------|----------|----------|----------|----------|----------|----------|--------|---------|
| Canonical                                       |             |          |          |          |          |          |          |          |          |        |         |
| CACYBP                                          |             | 165.78   | 92.89    | 122.82   | 83.67    | 227.99   | 106.71   | 179.87   | 175.77   | -0.810 | 0.015   |
| CCND1                                           |             | 6,516.83 | 3,898.05 | 3,155.43 | 4,537.47 | 6,621.78 | 2,144.03 | 9,094.81 | 5,150.43 | -0.810 | 0.015   |
| CCND2                                           |             | 86.43    | 13.16    | 293.16   | 117.15   | 0.72     | 89.82    | 29.97    | 89.36    | 0.786  | 0.021   |
| CCND3                                           |             | 937.41   | 1,007.92 | 617.39   | 867.92   | 1,203.73 | 678.52   | 1,135.72 | 1,010.64 | -0.929 | 0.001   |
| FOSL1                                           |             | 175.77   | 66.69    | 90.22    | 49.03    | 412.55   | 107.40   | 269.06   | 166.09   | -0.714 | 0.047   |
| GSK3B                                           |             | 225.91   | 191.50   | 190.40   | 180.46   | 266.21   | 149.92   | 266.86   | 198.59   | -0.905 | 0.002   |
| RUVBL1                                          |             | 125.36   | 77.86    | 109.96   | 86.58    | 153.39   | 100.63   | 126.90   | 140.85   | -0.714 | 0.047   |
| SENP2                                           |             | 124.27   | 111.00   | 97.28    | 105.20   | 126.55   | 81.51    | 125.76   | 101.12   | -0.786 | 0.021   |
| SFRP1                                           |             | 2,459.61 | 1,619.27 | 949.38   | 1,222.88 | 2,170.62 | 1,098.55 | 5,620.89 | 2,113.18 | -0.738 | 0.037   |
| TCF7L2                                          |             | 39.17    | 19.49    | 52.23    | 33.41    | 13.49    | 37.24    | 18.00    | 26.70    | 0.786  | 0.021   |
| Canonical, non-canonical (planar cell polarity) |             |          |          |          |          |          |          |          |          |        |         |
| DVL1                                            |             | 10.73    | 10.47    | 12.05    | 3.99     | 20.35    | 2.54     | 12.17    | 10.29    | -0.762 | 0.028   |
| Non-canonical                                   |             |          |          |          |          |          |          |          |          |        |         |
| Planar cell polarity                            |             |          |          |          |          |          |          |          |          |        |         |
| MAPK10                                          |             | 7.38     | 39.05    | 26.66    | 39.63    | 4.17     | 44.44    | 2.45     | 12.45    | 0.857  | 0.007   |
| RHOA                                            |             | 2,523.44 | 2,408.24 | 2,530.38 | 2,209.59 | 2,829.25 | 2,140.61 | 2,643.11 | 2,485.09 | -0.786 | 0.021   |
| ROR2                                            |             | 57.42    | 41.33    | 65.34    | 159.95   | 4.39     | 203.68   | 7.99     | 26.51    | 1.000  | -       |
| CAMK2D                                          |             | 46.67    | 24.89    | 40.25    | 19.40    | 46.70    | 17.40    | 50.22    | 34.04    | -0.786 | 0.021   |
| Wnt/calcium                                     |             |          |          |          |          |          |          |          |          |        |         |
| FZD6                                            |             | 63.46    | 69.60    | 68.08    | 64.25    | 89.38    | 58.28    | 99.81    | 75.71    | -0.905 | 0.002   |
| FZD8                                            |             | 23.62    | 20.54    | 17.28    | 16.94    | 33.37    | 15.30    | 23.32    | 36.36    | -0.833 | 0.010   |
| PLCB1                                           |             | 25.67    | 33.52    | 31.78    | 34.07    | 25.19    | 32.61    | 24.12    | 26.69    | 0.738  | 0.037   |
| PPP3CA                                          |             | 87.41    | 69.01    | 49.95    | 58.11    | 81.70    | 54.79    | 122.04   | 61.31    | -0.714 | 0.047   |
| PPP3CC                                          |             | 190.08   | 185.71   | 193.40   | 168.71   | 229.58   | 134.21   | 193.80   | 196.11   | -0.881 | 0.004   |
| PRICKLE2                                        |             | 188.92   | 232.91   | 213.21   | 308.25   | 142.25   | 284.21   | 150.71   | 181.02   | 0.905  | 0.002   |
| PRKCB                                           |             | 3.74     | 3.63     | 0.50     | 0.50     | 7.33     | 0.50     | 4.21     | 3.04     | -0.890 | 0.003   |

ROR2, receptor tyrosine kinase-like orphan receptor 2; IPF, idiopathic pulmonary fibrosis.
